# Supplementary material for: Phylogenetic Placement of Isolates Within the Trans-Eurasian Clade A.Br.008/009 of Bacillus anthracis
Source: MDPI journal article supplement (doi:10.3390/microorganisms7120689), 2019-12-12
Supplement: s1 [file Supplementary Table S1 Genome sequences accession numbers.xlsx]

## Sheet: Suppl. Table S1
Supplemental table S1: Genome sequences accession numbers of newly sequenced and additional B. anthracis strains from publically available databases.
Strain designation	Country	Year	SNP-group	Accession number (chromosome)
Ames Ancestor	U.S.A.	1981	A.Br.Ames	NC_007530
BUL 40 (3188)	Bulgaria	1960-80	A.Br.008/009	SRR10382406
BUL 5 (3154)	Bulgaria	1960-80	A.Br.008/009	ANFF00000000
BUL 12 (3161)	Bulgaria	1960-80	A.Br.008/009	SRR10382405
BUL 14 (3163)	Bulgaria	1960-80	A.Br.008/009	SRR10382394
BUL 16 (3165)	Bulgaria	1960-80	A.Br.008/009	SRR10382383
BUL 17 (3166)	Bulgaria	1960-80	A.Br.008/009	ANFG00000000
BUL 18 (3167)	Bulgaria	1960-80	A.Br.008/009	SRR10382379
BUL 19 (3168)	Bulgaria	1960-80	A.Br.008/009	SRR10382378
BUL 22 (3171)	Bulgaria	1960-80	A.Br.008/009	SRR10382377
BUL 28 (3177)	Bulgaria	1960-80	A.Br.008/009	SRR10382376
BUL 31 (3179)	Bulgaria	1960-80	A.Br.008/009	SRR10382375
BUL 32 (3180)	Bulgaria	1960-80	A.Br.008/009	SRR10382374
A186	France	1996	A.Br.008/009	SRR10382404
A027	Germany	unknown	A.Br.008/009	SRR10382403
A028	Germany	1952	A.Br.008/009	SRR10382402
A029	Germany	1954	A.Br.008/009	SRR10382401
A043	Germany	1950ies	A.Br.008/009	SRR10382400
A049	Germany	unknown	A.Br.008/009	SRR10382399
A087	Germany	1951	A.Br.008/009	SRR10382398
3016	Iran	1936	A.Br.008/009	SRR10382397
4-IZSLT	Italy	unknown	A.Br.011/009	SRR10382396
A166	France	1984	A.Br.011/009	SRR10382395
342/02	Spain	2005	A.Br.011/009	SRR10382393
A179	France	1982	A.Br.011/009	SRR10382392
373	Germany	1962	A.Br.011/009	SRR10382391
A171	France	1989	A.Br.011/009	SRR10382390
Ferrara	Italy	unknown	A.Br.011/009	SRR10382389
A168	France	1998	A.Br.011/009	SRR10382388
A193a	France	1997	A.Br.011/009	SRR10382387
A169	France	1999	A.Br.011/009	SRR10382386
319/02	Spain	2005	A.Br.011/009	SRR10382385
A091 (Pollino)	Italy	2004	A.Br.011/009	SRR10382384
IP4070	France	1991	A.Br.011/009	SRR10382382
A182	France	2008	A.Br.011/009	SRR10382381
A178	France	2008	A.Br.011/009	SRR10382380
Tsiankovskii-I	Russia	1960	A.Br.008/009	NZ_ABDN02000000
Cvac02	China (possibly not)	2012	A.Br.008/009	CP008853
A0062	Poland	*	A.Br.008/009	SRR2968154
1056/51	Russia	unknown	A.Br.008/009	ERR3170365
LP50_3Ya	Russia	2015	A.Br.008/009	ERR3170362
A0362	Norway	*	A.Br.008/009	SRR2968203
A0628	China	1981	A.Br.008/009	SRR2968206
K3974	Slovakia	*	A.Br.008/009	LGIF01000000
3186 (A11193, BUL 38)	Bulgaria	1960-80	A.Br.008/009	SRR2968197
3187 (A11194, BUL 39)	Bulgaria	1960-80	A.Br.008/009	SRR2968186
Larissa	Greece	2012	A.Br.008/009	CP012519
A1033	Albania	*	A.Br.008/009	SRR2968213
A1035	Albania	*	A.Br.008/009	SRR2968140
A0245	Turkey	*	A.Br.008/009	SRR2968159
A0417	Hungary	*	A.Br.008/009	SRR2968205
A0604	China	1981	A.Br.008/009	SRR2968172
A0032	China	*	A.Br.008/009	SRR2968199
K2129	China	*	A.Br.008/009	LFYG01000000
A0033	China	*	A.Br.008/009	SRR2968153
A0696	China	1982	A.Br.008/009	SRR2968208
A0675	China	1982	A.Br.008/009	SRR2968207
A0481 (STI)	Russia	*	A.Br.008/009	SRR2968168
LP51_4Ya	Russia	2015	A.Br.008/009	ERR3170363
A0847	Italy	1997	A.Br.008/009	SRR2968175
A0293	Italy	*	A.Br.008/009	SRR2968137
A0157	USA	1952	A.Br.008/009	CP010342
Smith 1013	unknown	*	A.Br.008/009	CM002879
Pasteur	England	*	A.Br.008/009	CP009476
A0150	Turkey	1995	A.Br.008/009	SRR2968200
A0241	Turkey	*	A.Br.008/009	SRR2968136
A4566	Denmark**	2012	A.Br.008/009	SRR1999716
UR-1	Germany**	2012	A.Br.008/009	ALNY01000000
2002721572	USA**	1988	A.Br.008/009	SRR1999668
Ba4599	Scotland**	2009	A.Br.008/009	SRR1999686
A4606	Scotland**	2010	A.Br.008/009	SRR1999695
2002013072	USA	1960	A.Br.008/009	SRR1999667
2000032955	USA**	1958	A.Br.008/009	SRR1999666
A0149	Turkey	1991	A.Br.008/009	SRR1318540
2000032945	unknown	*	A.Br.008/009	SRR2339653
A0264	Turkey	1984	A.Br.008/009	SRR1999417
A0897	Ethiopia	*	A.Br.008/009	SRR1285612
PAK-1	Pakistan	1978	A.Br.008/009	CP009325
A0684	China	1982	A.Br.008/009	SRR2968138
A0873	Italy	1972	A.Br.011/009	SRR2968180
A1082	Italy	*	A.Br.011/009	SRR2968185
A1050	Italy	*	A.Br.011/009	SRR2968214
ANSES_088	France	1990	A.Br.011/009	ERR1198963
95014	unknown	*	A.Br.011/009	JANG01000000
A1144	Argentina	*	A.Br.011/009	CP010852
A0878	Italy	*	A.Br.011/009	SRR2968181
Carbosap	Italy	1940-45	A.Br.011/009	ANAO01000000
ANSES_99-100	France	1999	A.Br.011/009	JHDR02000000
A0894	Italy	1997	A.Br.011/009	SRR2968212
A0891	Italy	1989	A.Br.011/009	SRR2968210
ANSES_060	France	ca. 1900	A.Br.011/009	ERR1841051
A0862a	Italy	1984	A.Br.011/009	SRR2968179
A0401	France	*	A.Br.011/009	SRR2968204
A0860	Italy	1984	A.Br.011/009	SRR2968178
K0021	Italy	*	A.Br.011/009	LFYI01000000
A0854	Italy	1999	A.Br.011/009	SRR2968177
Pollino	Italy	2014	A.Br.011/009	CP010813
ANSES_059	France	unknown	A.Br.011/009	ERR1841050
London 499	United Kingdom	2006	A.Br.011/009	SRR2094271
London 497	United Kingdom	2006	A.Br.011/009	SRR2094269
London 491	United Kingdom	2006	A.Br.011/009	SRR2094266
London 496	United Kingdom	2006	A.Br.011/009	SRR2094267
Scotland 476	United Kingdom	2006	A.Br.011/009	SRR2094254
Scotland 479	United Kingdom	2006	A.Br.011/009	SRR2094258
Scotland 472	United Kingdom	2006	A.Br.011/009	SRR2094245
Scotland 480	United Kingdom	2006	A.Br.011/009	SRR2094257
Gmb1	The Gambia	2010	A.Br.011/009	CAVE010000000
Sen3	Senegal	2010	A.Br.011/009	CAVD010000000
Sen2Col2	Senegal	2010	A.Br.011/009	CAVC010000000
A0303	Canada	*	A.Br.WNA	SRR2968201
A0174	Canada	1995	A.Br.WNA	NZ_ABLT01000000
strains sequenced as part bof this study in blue
*information missing (Sahl et al., 2016).**likely imported
Sahl JW, Pearson T, Okinaka R, Schupp JM, Gillece JD, Heaton H, et al. (2016) A Bacillus anthracis genome sequence from the Sverdlovsk 1979 autopsy specimens. MBio 7.
