# Supplementary material for: Phylogenetic Placement of Isolates Within the Trans-Eurasian Clade A.Br.008/009 of Bacillus anthracis
Source: MDPI journal article supplement (doi:10.3390/microorganisms7120689), 2019-12-12
Supplement: s1 [file Supplementary Table S3_Primers.xlsx]

## Sheet: Suppl. Table S3 Primers
Supplementary Table S3: Primers for DMAA PCR used to group additional B. anthracis strains into new and previously defined canSNP groups.
SNP designation	Position	Variation (allele base)	Forward (ANC and DER) and reverse (REV) primers (5‘-3‘)
A.Br.105* (Tsiankovskii)	1512630	G (DER), A (ANC)	ANC: ATTTAAATATTTCATTACAATTAGCGCAAATGCA
			DER: ATTTAAATATTTCATTACAATTAGCGCAAATGCG
			REV: CTTCTTCTAGTGAACATGAAATTGGAAC
A.Br.118 (STI)*	172756	T (DER), C (ANC)	ANC: GTTGGAGCAAGCTTAGTTAGC
			DER: GTTGGAGCAAGCTTAGTTAGT
			REV: TGGTGCGCAGAAAGTATATAGTAAC
A.Br.127 (Pasteur*	72398	T (DER), G (ANC)	ANC: AAGTTATTGCAACAGGTGGATAGG
			DER: AAGTTATTGCAACAGGTGGATAGT
			REV: TGGATCTACAACATCAATCACATTCG
A.Br.Pasteur-GER	385612	G (DER), A (ANC)	ANC: AAGCTGTGTATAATGAGGATTTATTTACA
			DER: AAGCTGTGTATAATGAGGATTTATTTACG
			REV: CGTGATTGTAGTTAATTGTTCATGTTCC
A.Br.Pasteur-BUL	99992	T (DER), C (ANC	ANC: CATTGGGAATGCAAGACCTCC
			DER: CATTGGGAATGCAAGACCTCT
			REV: CCTTTATATTCTAAATAACGACGCACC
A.Br.133 (Carbosap)*	81943	G (DER), A (ANC)	ANC: CTCTTGAGTATGGTATGCCTCATA
			DER: CTCTTGAGTATGGTATGCCTCATG
			REV: GGCGATCAATACCAATTCCTAGTC
A.Br.NN4	500787	A (DER), G (ANC)	ANC:GAGTAAGAAATGTTTAATTACAGGTGG
			DER: GAGTAAGAAATGTTTAATTACAGGTGA
			REV: CCACCAACTCTTCAGCTAAATGG
A.Br.140*			ANC: TGTCACGGCGTAACTGTAAATAAACTG
			DER: TGTCACGGCGTAACTGTAAATAAACTA
			REV: ATTATATCCTCTGTTTAAAAATAACCTTGC
A.Br.147*	1776654	A (DER), G (ANC)	ANC: AAATGTATTAATTATCGATCAGCATATGG
			DER: AAATGTATTAATTATCGATCAGCATATGA
			REV: CAATTCCTACATACAAAATAAAAGGCTTTC
A.Br.161 (Heroin)	5013862	T (DER), A (ANC)	ANC: GCGGACTAAATAAAAAGGTTTAGTGCTGAT
			DER:GCGGACTAAATAAAAAGGTTTAGTGCTGAA
			REv: GTAAAGTATTGAGAGTGAATTGAAATGATG
*new DMAA PCR primers for previously defined canSNP clades [12]
Indicated in bold are ANC-, in italics DER-defining bases, antepenultimate mismatches are underlined.
[12] Sahl JW, Pearson T, Okinaka R, Schupp JM, Gillece JD, Heaton H, et al. (2016) A Bacillus anthracis genome sequence from the Sverdlovsk 1979 autopsy specimens. MBio 7.
