# Supplementary material for: Phylogenetic Placement of Isolates Within the Trans-Eurasian Clade A.Br.008/009 of Bacillus anthracis
Source: MDPI journal article supplement (doi:10.3390/microorganisms7120689), 2019-12-12
Supplement: s1 [file Supplementary Table S4 MLVA_Data.xlsx]

## Sheet: Suppl. Table S4 MLVA matrix
Supplemental Table S4: MLVA-31 matrix of genome-sequenced B. anthracis strains and their closest relatives and origin of strains.
																MLVA marker
Name	Origin	Country	Year	bams1	bams3	bams5	bams13	bams15	bams21	bams22	bams23	bams24	bams25	bams28	bams30	bams31	bams34	bams44	bams51	bams53	CG3	vrrA	vrrB1	vrrB2	vrrC1	vrrC2	pX01	pX02	VNTR12	VNTR16	VNTR17	VNTR19-2	VNTR23	VNTR35
373	unknown	Germany	1962	13	30	0	74	46	9	13	10	9	4	14	72	53	7	8	9	8	1	4	17	14	56	15	0	6	6	8	4	5	4	3
A27	unknown	Germany	unknown	13	30	7	28	46	9	13	10	9	4	14	72	64	7	8	9	8	1	4	17	14	57	19	7	7	6	8	4	5	4	3
A28	unknown	Germany	1952	13	30	7	28	46	9	13	10	9	4	14	72	64	7	8	9	8	1	4	17	14	57	19	7	7	6	8	4	5	4	3
A29	unknown	Germany	1954	13	30	7	28	46	9	13	10	9	4	14	72	64	7	8	9	8	1	4	17	14	57	19	7	7	6	8	4	5	4	3
A43	unknown	Germany	1950ies	13	30	7	28	46	9	13	10	9	4	14	51	61	7	8	9	8	1	4	17	14	57	15	7	7	6	8	4	5	4	3
A49	unknown	Germany	unknown	13	30	7	28	46	9	13	10	9	4	14	72	64	7	8	9	8	1	4	17	14	57	19	7	7	6	8	4	5	4	3
A87	unknown	Germany	1951	13	30	7	28	46	9	13	10	9	4	14	72	64	7	8	9	8	1	4	17	14	57	19	7	7	6	8	4	5	4	3
4-IZSLT	unknown	Italy	unknown	13	30	7	30	24	9	13	10	9	4	14	76	65	9	8	9	8	1	2	17	14	56	19	7	6	6	8	4	5	4	3
3016	Cattle	Iran	1936	13	30	7	30	46	9	13	10	9	4	14	74	64	9	8	9	8	2	4	17	14	56	19	0	6	6	8	4	5	4	3
BUL 5	Soil	Bulgaria	1960-1980	13	30	7	29	46	0	13	10	9	4	14	74	64	7	8	9	8	1	5	17	14	56	19	0	0	6	8	0	5	4	3
BUL 12	Soil	Bulgaria	1960-1980	13	30	7	29	46	9	13	10	9	4	14	74	64	7	8	9	8	1	5	17	14	56	19	9	6	6	8	3	5	4	3
BUL 14	Soil	Bulgaria	1960-1980	13	30	7	29	46	9	13	10	9	4	14	74	64	7	8	9	8	1	5	17	14	56	19	9	6	6	8	3	5	4	3
BUL 16	Soil	Bulgaria	1960-1981	13	30	7	29	46	9	13	10	9	4	14	74	64	7	8	9	8	1	5	17	14	56	19	9	6	6	8	4	5	4	3
BUL 17	Soil	Bulgaria	1960-1980	13	30	7	30	46	9	13	10	9	4	14	74	56	7	8	9	8	1	5	17	14	56	19	9	6	6	8	3	5	4	3
BUL 18	Soil	Bulgaria	1960-1980	13	30	7	29	46	9	13	10	9	4	14	74	64	7	8	9	8	1	5	17	14	56	19	0	6	6	8	3	5	4	3
BUL 19	Soil	Bulgaria	1960-1980	13	30	7	29	46	9	13	10	9	4	14	74	64	7	8	9	8	1	5	17	14	56	19	9	6	6	8	3	5	4	3
BUL 22	Soil	Bulgaria	1960-1980	13	30	7	29	46	9	13	10	9	4	14	74	64	7	8	9	8	1	5	17	14	56	19	0	6	6	8	3	5	4	3
BUL 28	Soil	Bulgaria	1960-1980	13	30	7	29	46	9	13	10	9	4	14	74	64	7	8	9	8	1	5	17	14	56	19	9	6	6	8	3	5	4	3
BUL 31	Soil	Bulgaria	1960-1980	13	30	7	29	46	9	13	10	9	4	14	74	64	7	8	9	8	1	5	17	14	56	19	9	6	6	8	3	5	4	3
BUL 32	Soil	Bulgaria	1960-1980	13	30	7	29	45	9	13	10	9	4	14	74	64	7	8	9	8	1	5	17	14	56	19	0	6	6	8	3	5	4	3
BUL 38	Cattle	Bulgaria	1960-1980	13	30	7	30	46	9	13	10	9	4	14	75	64	7	8	9	8	1	5	17	14	56	19	6	6	6	8	3	5	4	3
BUL 39	Cattle	Bulgaria	1960-1980	13	24	7	30	46	9	13	10	9	4	14	75	64	7	8	9	8	1	5	17	14	56	19	6	6	6	8	3	5	4	3
BUL 40	Soil	Bulgaria	1960-1980	13	30	7	30	46	9	13	10	9	4	14	75	64	7	8	9	8	1	5	17	14	56	19	0	6	6	8	3	5	4	3
319/02	Human, cut.	Spain	2005	13	30	7	30	46	9	13	10	9	4	14	72	64	7	8	9	8	1	5	17	14	56	19	6	6	6	8	4	5	4	3
342/02	Human, cut.	Spain	2005	13	30	7	30	46	9	13	10	9	4	14	72	64	7	8	9	8	1	5	17	14	56	19	6	6	6	8	5	5	4	3
A166	Cattle	France	1984	13	28	7	30	24	9	13	10	9	4	14	75	65	7	8	9	8	1	3	17	14	57	19	7	7	6	8	4	5	4	3
A168	Cattle	France	1998	13	27	7	8	46	9	13	10	9	4	14	75	64	7	8	9	8	1	4	17	14	57	19	7	7	6	8	4	5	4	3
A169	Cattle	France	1999	13	30	7	30	44	9	13	10	9	4	14	75	64	7	8	9	8	1	4	17	14	57	19	7	7	6	8	4	5	4	3
A171	Cattle	France	1989	13	30	7	30	46	9	13	10	9	4	14	72	64	7	8	9	8	1	4	17	14	57	19	6	7	6	8	4	5	4	3
A178	Human	France	2008	13	30	7	30	46	9	13	10	9	4	14	51	64	7	8	9	8	1	4	17	14	57	19	7	7	6	8	4	5	4	3
A179	Sheep	France	1982	13	30	7	30	46	9	13	10	9	4	14	75	64	7	8	9	8	1	4	17	14	57	19	7	7	6	8	4	5	4	3
A182	Cattle	France	2008	13	30	7	30	46	9	13	10	9	4	14	75	64	7	8	9	8	1	4	17	14	57	19	7	7	6	8	4	5	4	3
A186	Human	France	1996	13	30	7	17	46	9	13	10	10	4	14	75	64	7	8	9	8	1	4	17	14	57	19	7	7	6	8	4	5	4	3
A193a	Cattle	France	1997	13	30	7	18	46	9	13	10	9	4	14	75	64	7	8	9	8	1	4	17	14	57	19	5	7	6	8	4	5	4	3
UR-1	Human	Germany	2012	13	30	7	30	46	9	13	10	9	3	14	74	64	7	8	9	8	2	4	17	14	56	19	9	7	7	8	4	5	4	3
Larissa	Goat	Greece	2012	13	18	7	30	44	9	13	10	9	4	14	74	64	7	13	9	8	1	4	17	14	37	19	10	6	6	8	4	5	4	3
Pollino	Cattle	Italy	2013	13	30	7	30	46	9	13	10	9	4	14	75	64	7	8	9	8	1	4	17	14	57	19	6	7	6	8	4	5	4	3
A091	Cattle	Italy	2004	13	30	7	30	46	9	13	10	9	4	14	75	64	7	8	9	8	1	4	17	14	57	19	6	7	6	8	4	5	4	3
A150	unknown	Germany	2007	13	30	7	28	24	9	13	10	9	4	14	72	64	7	8	9	8	1	4	17	14	57	19	7	7	6	8	4	5	4	3
A200	unknown	unknown	unknown	13	30	7	17	46	9	13	10	10	4	14	75	64	7	8	9	8	2	4	17	14	57	19	0	7	6	8	4	4	4	3
A201	unknown	unknown	unknown	13	30	6	30	46	9	13	10	9	4	14	75	64	7	8	9	8	2	4	17	14	57	19	7	7	6	8	4	4	4	3
RKI Behring	unknown	unknown	unknown	13	30	6	30	42	9	13	10	9	4	14	6	64	7	8	9	8	1	4	17	14	57	19	0	7	6	8	4	4	4	3
IP 4070	unknown	France	1991	13	30	7	30	42	9	13	10	9	4	14	72	64	7	8	9	8	1	4	17	14	57	19	7	7	6	8	4	5	4	3
A005	unknown	prob. Austria	1971	13	30	7	30	46	9	11	8	9	4	14	78	64	7	8	9	8	1	3	17	14	57	19	9	7	6	8	4	5	4	3
A032	unknown	Germany	1957	16	28	6	76	46	9	13	10	9	4	14	51	65	9	8	9	8	2	4	17	14	53	15	8	6	6	143	4	4	3	4
A033	unknown	Germany	1957	13	30	8	30	46	9	13	10	9	3	14	78	64	7	8	9	8	2	4	13	14	57	19	9	7	6	8	4	5	4	3
A162	unknown	Germany	1957	13	30	8	30	46	9	13	10	9	3	14	78	64	7	8	9	8	2	4	13	14	57	19	9	7	6	8	4	5	4	3
A163	unknown	Germany	1957	7	28	7	76	46	9	13	10	9	4	14	51	50	9	8	9	8	2	4	17	14	53	15	8	7	6	143	4	4	3	4
Strains genome-sequenced in this work are highlighted in blue
